1 Outdoor Physical Activity as a Confounder for Vitamin D Status: A Scoping Review Protocol

2

3 Patrick G. Corr<sup>1\*</sup>¶, Alia M. Badawi<sup>1¶</sup>, Stephanie H. Vu<sup>1¶</sup>, Leigh A. Frame<sup>1&</sup>

4

5

6 <sup>1</sup>The George Washington University School of Medicine and Health Sciences, Washington,  
7 D.C., USA

8

9 \*Corresponding Author, email: [pcorr@gwu.edu](mailto:pcorr@gwu.edu) (PGC)

10

11 ¶ These authors contributed equally to this work and have approved the following manuscript

12 & This author contributed equally to this work and served as senior author

13

14

15

16

17

18

19

20

21

22

23

24

25

26

27

28

29

30

31

32

33

34

## Abstract

35  
36  
37  
38  
39  
40  
41  
42  
43  
44  
45  
46  
47  
48  
49  
50  
51  
52  
53  
54  
55  
56  
57  
58  
59  
60  
61

**Background:** Vitamin D (vitD) has been correlated with a number of health outcomes and disease states; however, these relationships are likely confounded by the role of outdoor physical activity (PA). Currently, there are few studies that consider confounders to vitD status and the potentially spurious relationships between PA and vitD status.

**Methods:** This scoping review will employ Arksey and O'Malley's five-stage approach. Publications will be identified through five databases (CINAHL, Cochrane Library, PubMed, Scopus, and SportDISCUS) and reviewed in Covidence.

**Results:** The findings are expected to help identify what information is presently available regarding the correlation between outdoor PA and vitD status. The results of this scoping review will help to inform a quantitative analysis of the National Institutes of Health (NIH) All of Us database.

**Discussion:** It is unclear what effect outdoor PA may have on the relationship between vitD status and health outcomes and if any portion of this relationship is spurious. This scoping review will initiate an exploration of the relationship between vitD and PA to determine the strength and magnitude of potential confounders. Ultimately, we seek to reassess previous findings and determine the true effect of vitD alone by isolating the effect of outdoor PA.

**Keywords:** Vitamin D; Outdoor Physical Activity; Endogenous Synthesis; Photoproduction; Nutritional Status; Scoping Review Protocol

62

## Introduction

63 Vitamin D (vitD) is a well-known fat-soluble hormone that is often discussed in reference  
64 to health benefits and disease states. Most commonly, it is known for its ability to facilitate  
65 calcium and phosphorus absorption in the body—the function that earned it distinction as a  
66 vitamin. More recently, a role for vitD in immune function has been elucidated. VitD is primarily  
67 obtained through endogenous production of 25-hydroxyvitamin D<sub>3</sub> (cholecalciferol) from 7-  
68 dehydrocholesterol (provitamin D<sub>3</sub>) after skin is exposed to sunlight (photoproduction); this  
69 process subsequently triggers 7-dehydrocholesterol (7-DHC) in the epidermis to be converted to  
70 provitamin D<sub>3</sub>, which then spontaneously isomerizes to vitamin D<sub>3</sub> [2]. Photoproduction is the  
71 primary source of vitD for humans. Smaller amounts of vitD are also obtained exogenously  
72 through the diet as vitD<sub>3</sub> and vitD<sub>2</sub> (ergocalciferol); though, dietary vitD is a minor contributor to  
73 overall vitD status [2]. Additionally, vitD<sub>3</sub> is more effective at raising overall serum 25(OH)D  
74 concentration than dietary or supplemental vitD<sub>2</sub>, even when taken at similar doses [3]. Both  
75 forms require activation through hydroxylation reactions that take place in the liver and in the  
76 kidneys to exert physiologic effects. These hydroxylation steps produce vitD metabolites: the  
77 circulating form 25-hydroxyvitamin D [25(OH)D] and the activated form 1,25-dihydroxyvitamin  
78 D [1,25(OH)<sub>2</sub>D] [4]. Serum 25(OH)D<sub>3</sub>, 25(OH)D<sub>2</sub>, and total 25(OH)D are used to quantify vitD  
79 status [5]. Clinically, total 25(OH)D alone is typically used, overlooking the important  
80 physiological differences between vitD<sub>2</sub> and vitD<sub>3</sub> [5].

81

## Background and Rationale

82 Although dietary vitamin D (vitD), which is predominantly vitD<sub>3</sub>, has been identified as a  
83 minor contributor to overall vitD status, the photoproduction of vitD<sub>3</sub> during exposure to  
84 ultraviolet B (UV-B) radiation has been well-researched and identified as the primary source in

85 humans. Therefore, time spent outdoors may be used as a proxy, convenience measure for vitD  
86 photoproduction. Hence, outdoor physical activity (PA) in existing vitD-related research is  
87 utilized as a representation of UV-B exposure; however, the relationship between outdoor PA  
88 and vitD status both dependent upon and independent of UV-B exposure and potential  
89 confounding effects is not well studied [2,3,5,7]. Health benefits from outdoor PA that are not at  
90 all related to vitD status (i.e. independent relationships) as well as benefits that are directly  
91 related to vitD (i.e. dependent relationships) are well established in the literature. The  
92 independent benefits of outdoor PA may lead researchers to inaccurately report spurious  
93 associations between these two variables. Thus, the potential for these spurious relationships may  
94 throw off exercise science and nutrition research as it relates to vitD status and related health  
95 outcomes.

96         The strength and magnitude of the confounding between vitD and PA has not been  
97 clearly described to our knowledge. This is despite research on vitD and health outcomes seeing  
98 substantial growth, especially with the 2011 report on dietary reference intakes for vitD from the  
99 then Institute of Medicine, now the National Academy of Medicine (**Error! Reference source**  
100 **not found.**) [8]. Whether these publications are potentially biased by or include spurious  
101 associations is unclear; however, the potential for such spurious associations to alter the results  
102 or at least the magnitude of those results is great. Therefore, the potential for spurious  
103 relationship related to vitD and PA must be explored in depth. This scoping review seeks to  
104 identify where and how these relationships are discussed currently in the literature as an initial  
105 step.

106 **Figure 1:** PubMed.gov Search Results

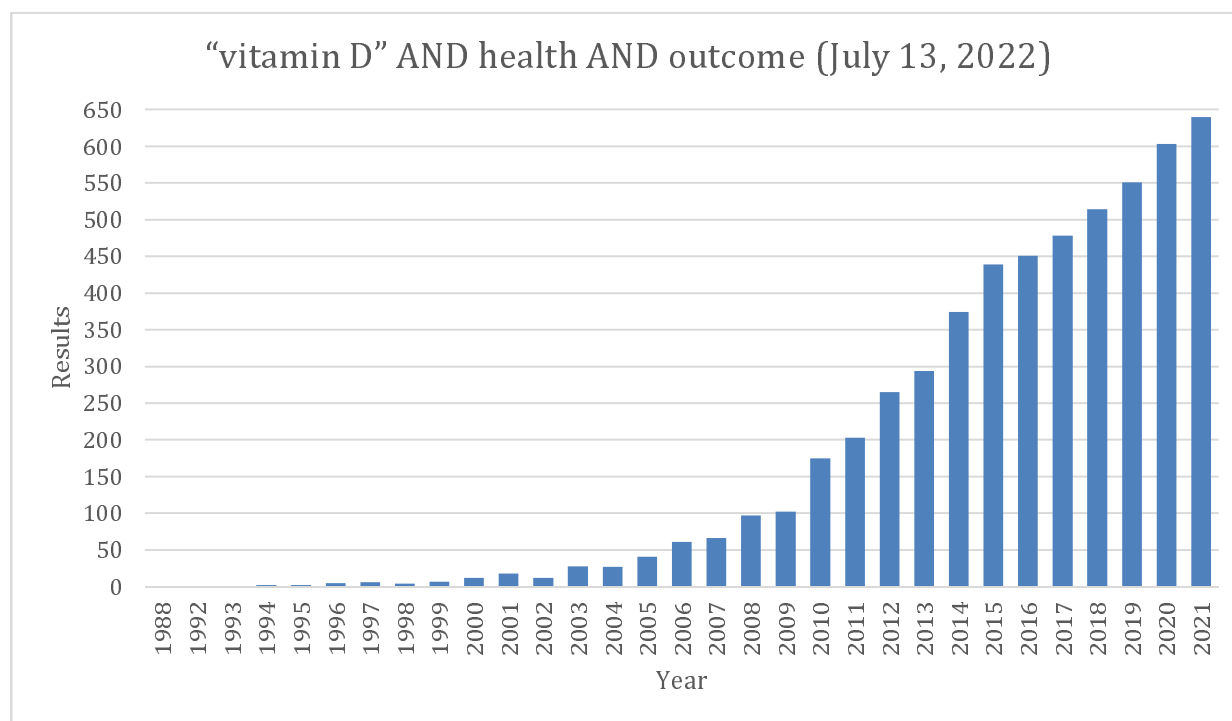

107

## 108 Objectives

109 This scoping review is the first phase in a comprehensive study considering the strength  
110 of correlation between outdoor PA and vitD status, potential confounding effects, and previously  
111 identified spurious relationships between outdoor PA and vitD. Following the completion of this  
112 scoping review, a quantitative study will be conducted through the National Institutes of Health  
113 (NIH) All of Us Research Database analyzing variables of interest including 25(OH)D<sub>3</sub>,  
114 25(OH)D<sub>3</sub> + D<sub>2</sub>, total 25(OH)D, calciferol (vitD<sub>2</sub>), cholecalciferol (vitD<sub>3</sub>), and FitBit data [5,  
115 9]. The All of Us Research Database contains several markers of vitD status and includes the  
116 ability to distinguish vitD<sub>3</sub>, which is from endogenous photoproduction, dietary sources, and  
117 dietary supplements, and vitD<sub>2</sub>, which is driven predominantly by prescription supplementation  
118 and has a lower affinity for the vitD receptor [3, 5].

## 119 Timeline

120 This scoping review was initiated in August 2022, reviewed by members of the research  
121 team, and shared with university reference librarians for initial feedback. The search strategy was  
122 finalized in October 2022 and initial review of the titles and abstracts was launched. Data  
123 extraction and analysis will begin in January 2023 and continue through February 2023. The  
124 results of this scoping review will be summarized and reported in March 2023.

## 125 **Methods & Protocol Design**

126 This scoping review is designed to follow the five-stage process as described by Arksey and  
127 O'Malley [1]:

- 128 1. Identifying the Research Question
- 129 2. Identifying Relevant Studies
- 130 3. Study Selection
- 131 4. Charting the Data
- 132 5. Collecting, Summarizing and Report the Data

133 These distinct steps are discussed in greater detail below and provide a roadmap for the scoping  
134 review protocol we present.

### 135 **Stage One: Identifying the Research Question**

136 Prior to developing the scoping review protocol, the research team conducted an initial,  
137 limited review of research considering the role of endogenous and exogenous vitD and their  
138 influence on overall vitD status as well as the correlations between vitD and various health  
139 outcomes and disease states. Through this initial research, a number of confounders to vitD  
140 status were identified; the largest identified gap was the relationship between outdoor PA and  
141 vitD status. With a clear background of the issue and the primary objective of this study in mind,  
142 the research team identified the following research questions to guide this scoping review:

- 143 1. What correlations exist between outdoor PA and vitD status?
- 144 2. How might regular outdoor PA improve health outcomes and/or disease conditions
- 145 independently of vitD, as opposed to dependent upon vitD?
- 146 a. What spurious relationships between vitD and outdoor PA have been previously
- 147 identified?
- 148 3. What is the potential for and magnitude of confounding via a spurious relationship?

## 149 **Stage Two: Identification of Relevant Studies**

150 The second stage of Arksey and O'Malley's process for developing effective scoping  
151 reviews calls for researchers to clearly delineate how they will select relevant studies [1]. The  
152 literature identified through this scoping review will be housed in Covidence, a tool to facilitate  
153 and organize review and analysis. We provide a detailed overview of our search strategy,  
154 inclusion and exclusion criteria, and our process for reviewing literature below.

### 155 **Search Strategy & Information Sources**

156 The search strategy for this scoping review was developed in consultation with a  
157 reference librarian at the George Washington University's Himmelfarb Health Sciences Library  
158 to ensure a comprehensive approach to collecting data. The review will include published  
159 manuscripts retrievable from the electronic databases through CINAHL, the Cochrane Database  
160 of Systematic Reviews, PubMed, Scopus, and SportDISCUS. A detailed overview of the search  
161 terms for each of these databases is provide in Table 1.

### 162 **Inclusion and Exclusion Criteria**

163 Consistent with Arksey and O'Malley's process of conducting scoping reviews, the  
164 research team has developed specific inclusion and exclusion criteria to ensure we are collecting  
165 relevant and appropriate publications [1]. As discussed, the researchers are pulling literature

166 from five electronic databases and, at initial search, have identified 2270 potentially relevant  
167 documents. To ensure that our search is strategic, we have identified the following inclusion  
168 criteria:

- 169 1. Published in English
- 170 2. Peer-reviewed publication
- 171 3. Considers the role of photoproduced vitD in disease prevention/health promotion
- 172 4. Has identified any form of PA in the objectives, methods, results, discussions, or  
173 conclusion section(s) of the publication

174 Based on conversations with our reference librarian and the research team, the following  
175 exclusion criteria were identified:

- 176 1. Published in any language other than English
- 177 2. Register of clinical trials without available results (i.e. notices of studies in progress)
- 178 3. Informal publications (e.g. blog posts, non-referred publications)

179 **Table 1:** Database Search Strategies

| <b>Database</b> | <b>Comprehensive Search Strategy</b>                                                                                                                                                                                                                                                                                                                                                       |
|-----------------|--------------------------------------------------------------------------------------------------------------------------------------------------------------------------------------------------------------------------------------------------------------------------------------------------------------------------------------------------------------------------------------------|
| CINAHL          | (SU (vitamin D OR vitamin D3 OR cholecalciferol) OR TI (vitamin D OR vitamin D3 OR cholecalciferol) OR AB (vitamin D OR vitamin D3 OR cholecalciferol))<br><br><i>AND</i><br><br>(SU (Physical Activity OR FitBit OR movement OR aerobic OR exercise OR physical fitness OR physical conditioning OR fitness tracker OR walking OR running) OR TI (Physical Activity OR FitBit OR movement |



|          |                                                                                                                                                                                                                                                                                                                                                                                                                                                                                                                                                                                                                        |
|----------|------------------------------------------------------------------------------------------------------------------------------------------------------------------------------------------------------------------------------------------------------------------------------------------------------------------------------------------------------------------------------------------------------------------------------------------------------------------------------------------------------------------------------------------------------------------------------------------------------------------------|
|          | <p>OR aerobic OR exercise OR physical fitness OR physical conditioning OR fitness tracker OR walking OR running) OR AB (Physical Activity OR FitBit OR movement OR aerobic OR exercise OR physical fitness OR physical conditioning OR fitness tracker OR walking OR running))</p> <p><i>AND</i></p> <p>(SU (sun exposure OR absorption OR photoproduction OR sunlight OR ultraviolet ray* OR skin OR UV) OR TI (sun exposure OR absorption OR photoproduction OR sunlight OR ultraviolet ray* OR skin OR UV) OR AB (sun exposure OR absorption OR photoproduction OR sunlight OR ultraviolet ray* OR skin OR UV))</p> |
| Cochrane | <p>((“vitamin D”) OR (“vitamin D3”) OR (cholecalciferol))</p> <p><i>AND</i></p> <p>((“Physical Activity”) OR (FitBit) OR (movement) OR (aerobic) OR (exercise) OR (“physical fitness”) OR (“physical conditioning”) OR (“fitness tracker”) OR (walking) OR (running))</p> <p><i>AND</i></p> <p>((“sun exposure”) OR (absorption) OR (photoproduction) OR (“ultraviolet ray*”) OR (skin) OR (UV) OR (sunlight))</p>                                                                                                                                                                                                     |
| PubMed   | <p>(vitamin D [tiab] OR vitamin D [MeSH Terms] OR vitamin D3 [tiab] OR</p>                                                                                                                                                                                                                                                                                                                                                                                                                                                                                                                                             |

|        |                                                                                                                                                                                                                                                                                                                                                                                                                                                                                                                                                                                                                                                                                                 |
|--------|-------------------------------------------------------------------------------------------------------------------------------------------------------------------------------------------------------------------------------------------------------------------------------------------------------------------------------------------------------------------------------------------------------------------------------------------------------------------------------------------------------------------------------------------------------------------------------------------------------------------------------------------------------------------------------------------------|
|        | <p>Cholecalciferol [tiab])</p> <p><i>AND</i></p> <p>(physical activity [MeSH terms] OR physical activit* [tiab] OR outdoor [tiab] OR FitBit [tiab] OR movement [tiab] OR aerobic [tiab] OR physical health [tiab] OR exercise [tiab] OR exercise [MeSH terms] OR physical fitness [tiab] OR physical fitness [MeSH terms] OR physical conditioning [tiab] OR physical conditioning, human [MeSH terms] OR fitness tracker* [tiab] OR walk* [tiab] OR run [tiab] OR running [tiab])</p> <p><i>AND</i></p> <p>(sun exposure [tiab] OR photoproduction [tiab] OR sunlight [tiab] OR ultraviolet ray* [tiab] OR skin [tiab] OR absorption [tiab] OR sunlight [mesh] OR sun [tiab] OR UV [tiab])</p> |
| Scopus | <p>(TITLE-ABS-KEY ("vitamin D") OR TITLE-ABS-KEY ("vitamin D3") OR TITLE-ABS-KEY (cholecalciferol))</p> <p><i>AND</i></p> <p>(TITLE-ABS-KEY ("Physical Activity") OR TITLE-ABS-KEY (FitBit) OR TITLE-ABS-KEY (movement) OR TITLE-ABS-KEY (aerobic) OR TITLE-ABS-KEY (exercise) OR TITLE-ABS-KEY ("physical fitness") OR TITLE-ABS-KEY ("physical conditioning") OR TITLE-ABS-KEY ("fitness tracker") OR TITLE-ABS-KEY (walking) OR TITLE-ABS-KEY</p>                                                                                                                                                                                                                                            |

|             |                                                                                                                                                                                                                                                                                                                                                                                                                                                                                                                                                                                                                                                                                                                                                                                                                                 |
|-------------|---------------------------------------------------------------------------------------------------------------------------------------------------------------------------------------------------------------------------------------------------------------------------------------------------------------------------------------------------------------------------------------------------------------------------------------------------------------------------------------------------------------------------------------------------------------------------------------------------------------------------------------------------------------------------------------------------------------------------------------------------------------------------------------------------------------------------------|
|             | <p>(running))</p> <p>AND</p> <p>(TITLE-ABS-KEY (“sun exposure”) OR TITLE-ABS-KEY (absorption) OR TITLE-ABS-KEY (photoproduction) OR TITLE-ABS-KEY (“ultraviolet ray*”) OR TITLE-ABS-KEY (skin) OR TITLE-ABS-KEY (UV) OR TITLE-ABS-KEY (sunlight))</p>                                                                                                                                                                                                                                                                                                                                                                                                                                                                                                                                                                           |
| SportDISCUS | <p>(SU (vitamin D OR vitamin D3 OR cholecalciferol) OR TI (vitamin D OR vitamin D3 OR cholecalciferol) OR AB (vitamin D OR vitamin D3 OR cholecalciferol))</p> <p>AND</p> <p>(SU (Physical Activity OR FitBit OR movement OR aerobic OR exercise OR physical fitness OR physical conditioning OR fitness tracker OR walking OR running) OR TI (Physical Activity OR FitBit OR movement OR aerobic OR exercise OR physical fitness OR physical conditioning OR fitness tracker OR walking OR running) OR AB (Physical Activity OR FitBit OR movement OR aerobic OR exercise OR physical fitness OR physical conditioning OR fitness tracker OR walking OR running))</p> <p>AND</p> <p>(SU (sun exposure OR absorption OR photoproduction OR sunlight OR ultraviolet ray* OR skin OR UV) OR TI (sun exposure OR absorption OR</p> |

|  |                                                                                                                                                                           |
|--|---------------------------------------------------------------------------------------------------------------------------------------------------------------------------|
|  | photoproduction OR sunlight OR ultraviolet ray* OR skin OR UV) OR AB<br>(sun exposure OR absorption OR photoproduction OR sunlight OR<br>ultraviolet ray* OR skin OR UV)) |
|--|---------------------------------------------------------------------------------------------------------------------------------------------------------------------------|

180

### Stage Three: Study Selection

181 The third stage of the Arksey and O'Malley process entails the elimination of the studies  
182 irrelevant to the central research question [1]. The research team will create a set of more  
183 detailed inclusion and exclusion criteria, related to the source of vitD, the comparison of  
184 variables, and the outcomes on the populations being studied. These criteria will be applied to  
185 the determine the relevance of studies, first solely to the titles and abstracts of selected studies  
186 and then to the full text articles. From there, the extracted data will be synthesized and  
187 interpreted.

### 188 Determining Relevance and Quality of Literature

189 The research team will conduct a three-phase process of reviewing publications for  
190 inclusion in this review. First, a title and abstract screening will be conducted to determine  
191 relevance given the questions guiding this study. In this first phase, two researchers will review  
192 each title and abstract to determine relevance. If there is not consensus among these two  
193 researchers, a senior researcher will provide a final determination. Second, the researchers will  
194 conduct a full-text review of each publication. In this phase, two researchers will be required to  
195 review each publication to determine whether it aligns with our specific inclusion criteria  
196 following the population, intervention, comparison, and outcome (PICO) guidelines [9]; again, a  
197 senior researcher will serve as a tiebreaker if necessary. If a study is excluded at full-text review,  
198 the rationale will be provided for publication in the PRISMA flow diagram. Finally, the third

199 step will include data extraction of relevant information for thematic analysis. The extraction  
200 form guiding this final step of the scoping review is available in Table 2.

#### 201 **Stage Four: Charting the Data**

202 The research team will use the data extraction form in the Covidence database, which  
203 provides a structured and auditable process to identify aspects of each study and ultimately to  
204 determine the relevance and/or limitations to our study. A summary of the specific material  
205 included in the form is provided in Table 2. This allows a uniform approach to all studies that are  
206 reviewed. From there, the findings of the extracted qualitative data will be synthesized,  
207 integrated, and interpreted into a thematic analysis process.

208 **Table 2:** Covidence Data Extraction Form

| <b>Data to Extract</b> | <b>Specific Material</b>                                                                                                    |
|------------------------|-----------------------------------------------------------------------------------------------------------------------------|
| <b>General Data</b>    | Title                                                                                                                       |
|                        | Authors                                                                                                                     |
|                        | Publication year                                                                                                            |
|                        | Publication source                                                                                                          |
|                        | Country                                                                                                                     |
|                        | Other notes                                                                                                                 |
|                        | Research question(s)                                                                                                        |
|                        | Aim of study/Objectives                                                                                                     |
|                        | Methods                                                                                                                     |
|                        | Study design                                                                                                                |
|                        | Do you have concerns about study design (e.g., not rigorous, variables not well defined, not controlling for PA, no control |

|                                 |                                                                                                                                                                                                          |
|---------------------------------|----------------------------------------------------------------------------------------------------------------------------------------------------------------------------------------------------------|
| <b>Characteristics of Study</b> | group, etc.)                                                                                                                                                                                             |
|                                 | Is primary outcome related to vitD & PA?                                                                                                                                                                 |
|                                 | If VitD&PA is not primary, explain inclusion rationale                                                                                                                                                   |
|                                 | Is sun exposure quantified?                                                                                                                                                                              |
|                                 | Describe how sun exposure is discussed                                                                                                                                                                   |
|                                 | Study start date                                                                                                                                                                                         |
|                                 | Study end date                                                                                                                                                                                           |
|                                 | Funding source                                                                                                                                                                                           |
|                                 | Potential conflicts of interest                                                                                                                                                                          |
| <b>Participants</b>             | Population description                                                                                                                                                                                   |
|                                 | Inclusion criteria                                                                                                                                                                                       |
|                                 | Exclusion criteria                                                                                                                                                                                       |
|                                 | Recruitment methods                                                                                                                                                                                      |
|                                 | Total n                                                                                                                                                                                                  |
| <b>Results</b>                  | Study conclusions                                                                                                                                                                                        |
|                                 | Clearly identify any relationship between vitD & PA discussed in this source                                                                                                                             |
|                                 | Clearly identify potential confounding between vitD & PA discussed in this source (e.g. the health benefits of PA leading to a spurious or false relationship between vitD and the same health benefits) |
|                                 | Clearly identify any other interactions between vitD & PA discussed in this source (e.g. skin color/race, veiling/religion,                                                                              |

|  |                                                                                 |
|--|---------------------------------------------------------------------------------|
|  | geography, etc.)                                                                |
|  | How does this source contribute to your understanding of the issue under study? |

209 **Stage Five: Collecting, Summarizing, and Reporting the Data**

210 This scoping review aims to identify and index existing evidence for confounding  
211 between vitD status and PA revealing a particular gap in the relationship between vitD and PA.  
212 The resulting information will be coded to provide an overview of how vitD markers in current  
213 research correlate with PA in addition to other measured health status indicators to map the  
214 relationship between these health measures and the potential for these relationships to be  
215 spurious. The resulting information will refine how the researchers analyze variables related to  
216 vitD and PA in the All of Us Research Database to better understand how PA impacts the  
217 relationship with vitD biomarkers and health outcomes [11].

218 **Limitations**

219 Because qualitative data is often specific to each study based on its variables and  
220 population, the data is sometimes not generalizable. Therefore, it can be difficult to apply a  
221 uniform thematic analysis process to all studies. As such, there will be a set of limitations  
222 presented in this study. We anticipate that some articles will not specify details of the variables  
223 studied, such as the vitD source or the type and location of PA, while others may have possible  
224 confounding or influencing variables, including but not limited to skin color/race,  
225 veiling/religion, and geography. Additionally, some studies may possibly have conflicts of  
226 interest involving author affiliations or funding sources, and we hope to be able to assess this in  
227 this scoping review. The research team will work to identify and account for as many of these  
228 factors as possible.

229  
230  
231  
232  
233  
234  
235  
236  
237  
238  
239  
240  
241  
242  
243  
244  
245  
246  
247  
248  
249  
250  
251

## **Conclusion**

VitD is a key nutrient for bone maintenance and extra-skeletal effects have recently been elucidated, primarily in immune homeostasis and surveillance. The primary driver of vitD status is exposure to UV-B radiation, which is also associated with outdoor PA. When studying the health outcomes associated with vitD status, it is unclear what effect outdoor PA may have on these relationships and if they are, in fact, spurious, as the effect is, at least in part, due to fitness or other effects from outdoor PA. This scoping review will be the first step in exploring the relationship between vitD and PA to determine the strength and magnitude of potential confounders. Ultimately, we would like to estimate the bias produced by this relationship to be able to reassess previous findings and determine the true effect of vitD alone by isolating the effect of outdoor PA.

## **Funding**

This research received no external funding.

## **Acknowledgments**

The authors would like to acknowledge Thomas Harrod, Associate Director of Reference, Instruction, and Access at the George Washington University's Himmelfarb Health Sciences Library for his generous guidance and support in developing the search strategies for this scoping review.

## **Author Contributors**

Conceptualization, PGC and LAF; Methodology, PGC, AMB, SHV, LAF; Writing – Original Draft Preparation, PGC, AMB, SHV; Writing – Review & Editing, LAF; Supervision, LAF.

## **Institutional Review Board Statement**

Not applicable.



252 **Conflict of Interest**

253 The authors declare no conflict of interest.

254

255

256

257

258

259

260

261

262

263

264

265

266

267

268

269

270

271

272

273

274

**References**

- 275 1. Arksey H, O'Malley L. Scoping studies: Toward a methodological framework. *Int. J.*  
276 *Social Research Methodology* 2005; 8(1):19-32.
- 277 2. Peterson LA, Zeng X, Caufield-Noll CP, Schweitzer MA, Magnuson TH, Steele KE.  
278 Vitamin D status and supplementation before and after bariatric surgery: a  
279 comprehensive literature review. *Surg Obes Relat Dis.* 2016;12(3):693-702.  
280 doi:10.1016/j.soard.2016.01.001
- 281 3. Peterson LA. Bariatric surgery and vitamin D: key messages for surgeons and clinicians  
282 before and after bariatric surgery. *Minerva Chir.* 2016;71(5):322-336.
- 283 4. Bikle DD. Vitamin D: Production, metabolism and mechanisms of action. [Updated 2021  
284 Dec 31]. In: Feingold KR, Anawalt B, Boyce A, et al., editors. Endotext [Internet]. South  
285 Dartmouth (MA): MDText.com, Inc.; 2000-. Available from:  
286 <https://www.ncbi.nlm.nih.gov/books/NBK278935/>
- 287 5. Sempos CT, Heijboer AC, Bikle DD, Bollerslev J, Bouillon R, Brannon PM, DeLuca HF,  
288 Jones G, Munns CF, Bilezikian JP, Giustina A, Binkley N. Vitamin D assays and the  
289 definition of hypovitaminosis D: results from the First International Conference on  
290 Controversies in Vitamin D. *Br J Clin Pharmacol.* 2018 Oct;84(10):2194-2207. doi:  
291 10.1111/bcp.13652.
- 292 6. Hibler EA, Sardo Molmenti CL, Dai Q, Kohler LN, Warren Anderson S, Jurutka PW,  
293 Jacobs ET. Physical activity, sedentary behavior, and vitamin D metabolites. *Bone.* 2016  
294 Feb;83:248-255. doi: 10.1016/j.bone.2015.11.016.
- 295 7. Fernandes MR, Barreto WDR Junior. Association between physical activity and vitamin  
296 D: A narrative literature review. *Rev Assoc Med Bras (1992).* 2017 Jun;63(6):550-556.  
297 doi: 10.1590/1806-9282.63.06.550. PMID: 28876433.

- 298 8. Ross AC, Manson JE, Abrams SA, et al. The 2011 report on dietary reference intakes for  
299 calcium and vitamin D from the Institute of Medicine: what clinicians need to know. *J*  
300 *Clin Endocrinol Metab.* 2011;96(1):53-58. doi:10.1210/jc.2010-2704
- 301 9. Ramirez AH, Gebo KA, Harris PA. Progress With the All of Us Research Program:  
302 Opening Access for Researchers. *JAMA.* 2021;325(24):2441-2442.  
303 doi:10.1001/jama.2021.7702
- 304 10. Methley AM, Campbell S, Chew-Graham C, McNally R, Cheraghi-Sohi S. PICO,  
305 PICOS, and SPIDER: A comparison study of specificity and sensitivity in three search  
306 tools for qualitative systematic reviews. *BMC Health Services Research* 2014; 14:1-10.  
307 Doi: 10.1186/s12913-014-0579-0
- 308 11. All of Us Research Program Investigators, Denny JC, Rutter JL, et al. The "All of Us"  
309 Research Program. *N Engl J Med.* 2019;381(7):668-676. doi:10.1056/NEJMsr1809937
